# Supplementary material for: Metabarcoding by Combining Environmental DNA with Environmental RNA to Monitor Fish Species in the Han River, Korea
Source: MDPI journal article supplement (doi:10.3390/fishes8110550), 2023-11-15
Supplement: s1 [file s1]

## Supplementary Data

Table S1. Environmental variables for three freshwater sampling locations in the Han River.

| Sampling location   | Geographic coordinate |            | Sampling date | Water temperature (°C) | Salt (ppm) |
|---------------------|-----------------------|------------|---------------|------------------------|------------|
|                     | Latitude              | Longitude  |               |                        |            |
| Paldang Lake (PL)   | 37°31'58"             | 127°18'58" | Apr. 25, 2022 | 20.3                   | 142.3      |
| Jamsil Bridge (JB)  | 37°31'23"             | 127°05'54" | May. 4, 2022  | 18.7                   | 100.7      |
| Haengju Bridge (HB) | 37°35'45"             | 126°48'29" | May. 4, 2022  | 18.7                   | 158.3      |

Table S2. Read count information of eDNA and eRNA sequences.

| Molecule | Location | Raw reads | Filtered reads | Denoised reads | Merged reads | Non-chimeric reads | Total number of ASVs |
|----------|----------|-----------|----------------|----------------|--------------|--------------------|----------------------|
| eDNA     | PL       | 364,409   | 329,063        | 319,251        | 165,796      | 75,978             | 258                  |
|          | JB       | 434,073   | 401,458        | 386,001        | 270,586      | 137,110            | 219                  |
|          | HB       | 360,111   | 348,175        | 335,606        | 266,315      | 112,980            | 212                  |
| eRNA     | PL       | 270,082   | 256,879        | 244,456        | 201,474      | 98,810             | 346                  |
|          | JB       | 421,892   | 413,422        | 388,294        | 312,914      | 151,276            | 331                  |
|          | HB       | 231,926   | 213,373        | 205,792        | 185,582      | 53,292             | 455                  |

Table S3. Comparison of species identified by eDNA and eRNA metabarcoding and previous specimen-capture survey (PSCS) data

| Order            | Family           | Genus                    | Species                             | PL   |      |      | JB   |      |      | HB   |      |      |
|------------------|------------------|--------------------------|-------------------------------------|------|------|------|------|------|------|------|------|------|
|                  |                  |                          |                                     | PSCS | eDNA | eRNA | PSCS | eDNA | eRNA | PSCS | eDNA | eRNA |
| Anabantiformes   | Channidae        | <i>Channa</i>            | <i>Channa argus</i>                 |      | •    |      |      | •    |      |      | •    |      |
| Anguilliformes   | Anguillidae      | <i>Anguilla</i>          | <i>Anguilla japonica</i>            |      |      |      |      | •    |      |      |      |      |
| Beloniformes     | Hemiramphidae    | <i>Hyporhamphus</i>      | <i>Hyporhamphus sajori</i>          |      |      |      |      |      |      | •    |      |      |
| Centrarchiformes | Centrarchidae    | <i>Lepomis</i>           | <i>Lepomis macrochirus</i>          |      | •    | •    |      | •    | •    |      | •    | •    |
|                  |                  | <i>Micropterus</i>       | <i>Micropterus salmoides</i>        | •    | •    | •    | •    | •    | •    | •    | •    | •    |
|                  |                  | <i>Siniperca</i>         | <i>Siniperca scherzeri</i>          |      | •    |      |      | •    |      |      | •    |      |
| Clupeiformes     | Engraulidae      | <i>Coilia</i>            | <i>Coilia nasus</i>                 |      |      | •    |      |      | •    | •    | •    | •    |
| Cypriniformes    | Acheilognathidae | <i>Acheilognathus</i>    | <i>Acheilognathus chankaensis</i>   |      | •    |      |      | •    |      |      | •    |      |
|                  |                  |                          | <i>Acheilognathus rhombeus</i>      |      |      |      |      | •    | •    |      |      |      |
|                  |                  |                          | <i>Acheilognathus yamatsutae</i>    |      | •    |      |      | •    |      |      |      |      |
|                  |                  | <i>Rhodeus</i>           | <i>Rhodeus ocellatus</i>            |      |      |      |      | •    |      |      |      |      |
|                  |                  |                          | <i>Rhodeus uyekii</i>               |      |      |      | •    |      |      |      |      |      |
|                  |                  | <i>Tanakia</i>           | <i>Tanakia lanceolata</i>           |      |      |      | •    | •    |      |      |      |      |
|                  |                  |                          | <i>Tanakia limbata</i>              |      |      | •    |      |      |      |      |      |      |
|                  |                  |                          |                                     |      |      |      |      |      |      |      |      |      |
|                  | Cobitidae        | <i>Iksookimia</i>        | <i>Iksookimia koreensis</i>         |      | •    |      |      | •    |      |      | •    |      |
|                  |                  | <i>Misgurnus</i>         | <i>Misgurnus anguillicaudatus</i>   | •    | •    | •    |      | •    | •    |      | •    |      |
|                  |                  |                          | <i>Misgurnus mohoity</i>            |      | •    |      |      | •    |      |      | •    |      |
|                  | Cyprinidae       | <i>Carassius</i>         | <i>Carassius auratus</i>            | •    | •    | •    |      | •    | •    | •    | •    | •    |
|                  |                  | <i>Cyprinus</i>          | <i>Cyprinus carpio</i>              | •    |      |      | •    |      |      | •    |      |      |
|                  |                  | <i>Pseudogobio</i>       | <i>Pseudogobio esocinus</i>         | •    |      |      | •    |      |      |      |      |      |
|                  |                  | <i>Sarcocheilichthys</i> |                                     |      |      |      | •    |      |      |      |      |      |
|                  |                  |                          | <i>Sarcocheilichthys variegatus</i> |      |      |      | •    |      |      |      |      |      |
|                  | Gobionidae       | <i>Abbottina</i>         | <i>Abbottina rivularis</i>          |      | •    | •    |      | •    |      |      |      |      |
|                  |                  | <i>Gobio</i>             | <i>Gobio gobio</i>                  |      | •    |      |      |      |      |      |      |      |
|                  |                  | <i>Hemibarbus</i>        | <i>Hemibarbus labeo</i>             | •    | •    |      | •    |      |      | •    |      |      |

|                |                 |                         |                                    |   |   |   |   |   |   |   |
|----------------|-----------------|-------------------------|------------------------------------|---|---|---|---|---|---|---|
|                |                 | <i>Pseudopungtungia</i> | <i>Pseudopungtungia nigra</i>      | • |   | • |   | • |   |   |
|                |                 | <i>Pseudorasbora</i>    | <i>Pseudorasbora parva</i>         |   |   | • |   |   |   |   |
|                |                 | <i>Pungtungia</i>       | <i>Pungtungia herzi</i>            | • |   | • | • |   | • | • |
|                | Leuciscidae     | <i>Alburnus</i>         | <i>Alburnus alburnus</i>           |   |   |   |   |   | • |   |
|                |                 | <i>Phoxinus</i>         | <i>Phoxinus keumkang</i>           | • |   | • |   |   | • |   |
|                |                 | <i>Rhynchocypris</i>    | <i>Rhynchocypris oxycephala</i>    | • |   |   |   |   |   |   |
|                | Xenocypridae    | <i>Chanodichthys</i>    | <i>Chanodichthys erythropterus</i> |   |   | • |   |   | • |   |
|                |                 | <i>Culter</i>           | <i>Culter alburnus</i>             | • | • | • | • |   | • | • |
|                |                 | <i>Hemiculter</i>       | <i>Hemiculter eigenmanni</i>       |   |   |   |   |   | • |   |
|                |                 |                         | <i>Hemiculter leucisculus</i>      |   |   |   |   |   | • |   |
|                |                 | <i>Nipponocypris</i>    | <i>Nipponocypris temminckii</i>    | • |   | • |   |   | • |   |
|                |                 | <i>Opsariichthys</i>    | <i>Opsariichthys uncirostris</i>   | • |   | • |   |   | • |   |
|                |                 | <i>Zacco</i>            | <i>Zacco platypus</i>              | • | • | • | • |   | • |   |
| Gobiiformes    | Gobiidae        | <i>Acanthogobius</i>    | <i>Acanthogobius hasta</i>         |   |   | • |   | • | • | • |
|                |                 |                         | <i>Acanthogobius lactipes</i>      |   |   |   |   |   | • |   |
|                |                 | <i>Gymnogobius</i>      | <i>Gymnogobius urotaenia</i>       |   |   |   |   |   | • |   |
|                |                 | <i>Rhinogobius</i>      | <i>Rhinogobius brunneus</i>        | • |   | • |   |   |   |   |
|                |                 |                         | <i>Rhinogobius similis</i>         |   | • | • | • | • | • | • |
|                |                 | <i>Tridentiger</i>      | <i>Tridentiger bifasciatus</i>     |   |   |   |   |   | • | • |
|                |                 |                         | <i>Tridentiger brevispinis</i>     | • | • | • | • | • | • | • |
|                | Odontobutidae   | <i>Odontobutis</i>      | <i>Odontobutis interruptus</i>     | • | • |   | • |   | • |   |
|                |                 |                         | <i>Odontobutis platycephala</i>    | • | • |   | • |   | • | • |
| Mugiliformes   | Mugilidae       | <i>Mugil</i>            | <i>Mugil cephalus</i>              | • |   | • | • |   | • | • |
|                |                 | <i>Planiliza</i>        | <i>Planiliza haematocheilus</i>    | • |   |   | • | • | • | • |
| Osmeriformes   | Plecoglossidae  | <i>Plecoglossus</i>     | <i>Plecoglossus altivelis</i>      | • |   | • |   |   | • |   |
| Pempheriformes | Lateolabracidae | <i>Lateolabrax</i>      | <i>Lateolabrax japonicus</i>       |   |   |   |   |   | • |   |
|                |                 |                         | <i>Lateolabrax maculatus</i>       |   |   |   |   |   | • |   |
| Perciformes    | Cottidae        | <i>Trachidermus</i>     | <i>Trachidermus fasciatus</i>      |   |   |   |   |   | • |   |
| Salmoniformes  | Salmonidae      | <i>Oncorhynchus</i>     | <i>Oncorhynchus masou</i>          | • |   |   |   |   |   |   |



Table S4. List of saltwater and brackish water fishes detected at each location by metabarcoding. PL: Paldang Lake; JB: Jamsil Bridge; HB: Haengju Bridge.

| Order             | Family          | Genus                | Species                        | PL   |      | JB   |      | HB   |      |
|-------------------|-----------------|----------------------|--------------------------------|------|------|------|------|------|------|
|                   |                 |                      |                                | eDNA | eRNA | eDNA | eRNA | eDNA | eRNA |
| Clupeiformes      | Clupeidae       | <i>Clupea</i>        | <i>Clupea harengus</i>         |      |      |      |      | •    |      |
| Gadiformes        | Gadidae         | <i>Gadus</i>         | <i>Gadus</i> sp.               |      |      | •    |      |      |      |
| Scombriformes     | Scombridae      | <i>Scomberomorus</i> | <i>Scomberomorus niphonius</i> |      |      | •    |      |      |      |
| Pleuronectiformes | Paralichthyidae | <i>Paralichthys</i>  | <i>Paralichthys olivaceus</i>  |      |      |      |      | •    |      |
| Chaetodontiformes | Leiognathidae   | <i>Nuchequula</i>    | <i>Nuchequula</i> sp.          | •    |      |      |      |      |      |
| Scombriformes     | Scombridae      | <i>Scomber</i>       | <i>Scomber</i> sp.             |      |      | •    |      |      |      |
| Lophiiformes      | Lophiidae       | <i>Lophius</i>       | <i>Lophius litulon</i>         | •    |      | •    |      | •    |      |
| Clupeiformes      | Engraulidae     | <i>Engraulis</i>     | <i>Engraulis japonicus</i>     |      |      | •    |      |      |      |

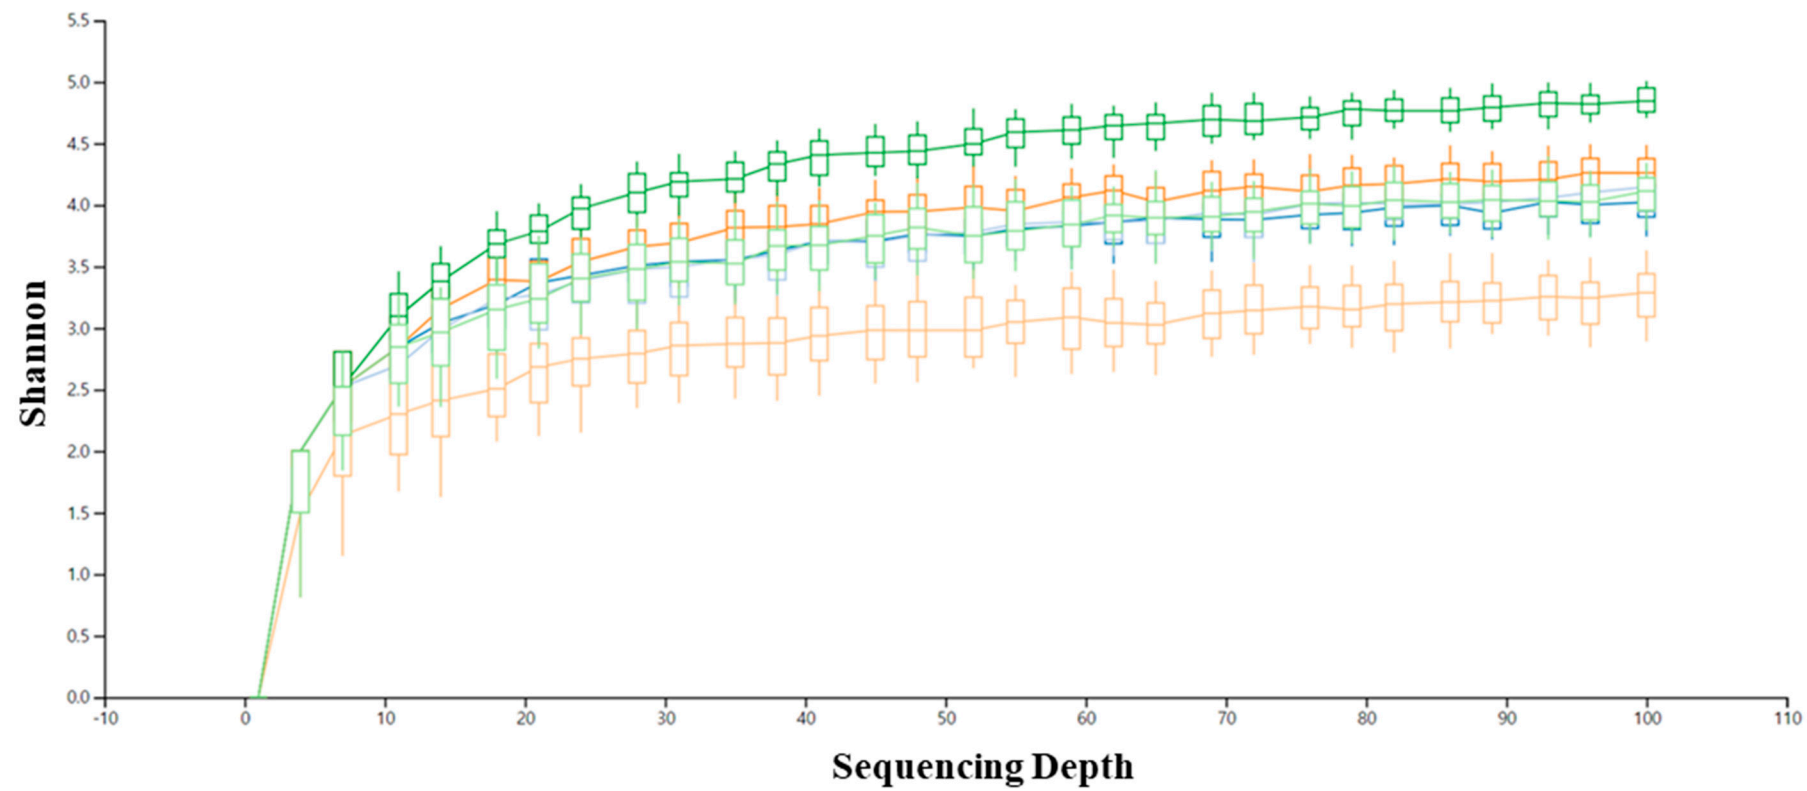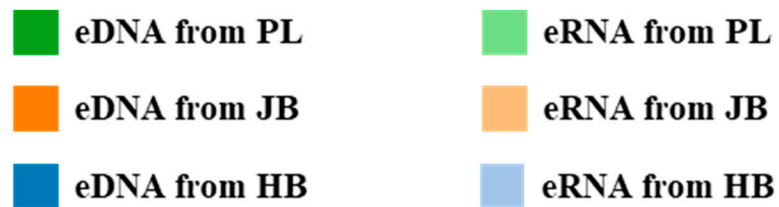

Figure S1. Rarefaction curves of eDNA and eRNA metabarcoding using 12S rRNA. Curves show predicted total diversity by sequencing depth. The X axis represents sample sequencing depth and Y axis represents species richness, as estimated by the Shannon index. The locations and molecules corresponding to each curve are shown on the bottom of the figure. PL: Paldang Lake; JB: Jamsil Bridge; HB: Haengju Bridge.
